# Supplementary material for: Unreprogrammed H3K9me3 prevents minor zygotic genome activation and lineage commitment in SCNT embryos
Source: PubMed Central journal article supplement (PMC10412629; doi:10.1038/s41467-023-40496-3), 2023-08-09
Supplement: 41467_2023_40496_MOESM3_ESM.pdf [file 41467_2023_40496_MOESM3_ESM.pdf]

## Reporting Summary

Nature Portfolio wishes to improve the reproducibility of the work that we publish. This form provides structure for consistency and transparency in reporting. For further information on Nature Portfolio policies, see our [Editorial Policies](#) and the [Editorial Policy Checklist](#).

### Statistics

For all statistical analyses, confirm that the following items are present in the figure legend, table legend, main text, or Methods section.

- |                                     |                                                                                                                                                                                                                                                                                                |
|-------------------------------------|------------------------------------------------------------------------------------------------------------------------------------------------------------------------------------------------------------------------------------------------------------------------------------------------|
| n/a                                 | Confirmed                                                                                                                                                                                                                                                                                      |
| <input type="checkbox"/>            | <input checked="" type="checkbox"/> The exact sample size ( $n$ ) for each experimental group/condition, given as a discrete number and unit of measurement                                                                                                                                    |
| <input type="checkbox"/>            | <input checked="" type="checkbox"/> A statement on whether measurements were taken from distinct samples or whether the same sample was measured repeatedly                                                                                                                                    |
| <input type="checkbox"/>            | <input checked="" type="checkbox"/> The statistical test(s) used AND whether they are one- or two-sided<br><i>Only common tests should be described solely by name; describe more complex techniques in the Methods section.</i>                                                               |
| <input type="checkbox"/>            | <input checked="" type="checkbox"/> A description of all covariates tested                                                                                                                                                                                                                     |
| <input type="checkbox"/>            | <input checked="" type="checkbox"/> A description of any assumptions or corrections, such as tests of normality and adjustment for multiple comparisons                                                                                                                                        |
| <input type="checkbox"/>            | <input checked="" type="checkbox"/> A full description of the statistical parameters including central tendency (e.g. means) or other basic estimates (e.g. regression coefficient) AND variation (e.g. standard deviation) or associated estimates of uncertainty (e.g. confidence intervals) |
| <input type="checkbox"/>            | <input checked="" type="checkbox"/> For null hypothesis testing, the test statistic (e.g. $F$ , $t$ , $r$ ) with confidence intervals, effect sizes, degrees of freedom and $P$ value noted<br><i>Give <math>P</math> values as exact values whenever suitable.</i>                            |
| <input checked="" type="checkbox"/> | <input type="checkbox"/> For Bayesian analysis, information on the choice of priors and Markov chain Monte Carlo settings                                                                                                                                                                      |
| <input type="checkbox"/>            | <input checked="" type="checkbox"/> For hierarchical and complex designs, identification of the appropriate level for tests and full reporting of outcomes                                                                                                                                     |
| <input type="checkbox"/>            | <input checked="" type="checkbox"/> Estimates of effect sizes (e.g. Cohen's $d$ , Pearson's $r$ ), indicating how they were calculated                                                                                                                                                         |

*Our web collection on [statistics for biologists](#) contains articles on many of the points above.*

### Software and code

Policy information about [availability of computer code](#)

Data collection

All sequence data were collected with the Illumina HiSeq X Ten or Nova platform.

Data analysis

Paired-end sequence data was trimmed adaptor and low-quality reads using cutadapt(v2.5). Then the filtered reads were processed using BWA (v0.7.17). The results (bigWig files) are shown in the track view generated with Integrative Genomics Viewer (IGV, v2.6.3). The H3K9me3 peaks were called with MACS2(v2.1.2) with the parameter "--broad" and over the input data. The enrichment of H3K9me3 peaks in annotated genomic regions was calculated using the Homer(v2.8) annotatePeaks command. The heatmap and profile line plot for the H3K9me3 signal around annotated genomic regions (i.e., CGIs, YY1 and H3K9me3 peaks) were generated using deepTools(v3.3.0). The genomic regions (i.e., LTRs, CGIs, promoters) with H3K9me3 modification were defined as those with the intersection of the H3K9me3 peak at the midpoint using the BEDtools(v2.30.0) intersect command with the parameters "-r -e -f 0.5". The TPM (transcripts per million) values of genes were obtained by StringTie(v2.0.3). Differential gene expression analysis was performed using DESeq2(v1.26.0). Functional enrichment analysis of gene sets was performed using the ClusterProfiler(v3.14.3).

Custom codes used for the analysis reported in this study are available at [<https://github.com/rysterzhu/H3K9me3-in-SCNT>].

For manuscripts utilizing custom algorithms or software that are central to the research but not yet described in published literature, software must be made available to editors and reviewers. We strongly encourage code deposition in a community repository (e.g. GitHub). See the Nature Portfolio [guidelines for submitting code & software](#) for further information.

## Data

Policy information about [availability of data](#)

All manuscripts must include a [data availability statement](#). This statement should provide the following information, where applicable:

- Accession codes, unique identifiers, or web links for publicly available datasets
- A description of any restrictions on data availability
- For clinical datasets or third party data, please ensure that the statement adheres to our [policy](#)

The H3K9me3 ULI-NChIP-seq data for oocytes, sperm, PN3, PN5, 2C, 4C, 8C, morula, ICM and TE of fertilized embryos were obtained from a previous publication<sup>26</sup> (GSE97778), and the H3K9me3 ULI-NChIP-seq data for CC, 6hpa, 14hpa, 2C, 4C, 8C, morula, ICM and TE of SCNT embryos were generated in this study.

The RNA-seq data for oocytes, PN5, E2C, L2C, 4C, 8C and ICM of fertilized embryos were obtained from a previous publication<sup>88</sup> (GSE71434). The RNA-seq data for SCNT embryos and other embryos were generated in this study.

The DNA methylation data for SCNT and fertilized embryos were obtained from a previous publication<sup>10</sup> (GSE108711).

The ChIP-seq data of Mcr51 in mESCs were obtained from a previous publication<sup>89</sup> (GSE51746).

The raw sequence data reported in this paper have been deposited into the Gene Expression Omnibus (GEO). The accession number for the SCNT H3K9me3 ChIP-seq, CUT&RUN, and RNA-seq data generated in this paper is GSE195762.

Custom codes used for the analysis reported in this study are available at [<https://github.com/rysterzhu/H3K9me3-in-SCNT>].

## Research involving human participants, their data, or biological material

Policy information about studies with [human participants or human data](#). See also policy information about [sex, gender \(identity/presentation\), and sexual orientation](#) and [race, ethnicity and racism](#).

|                                                                    |                                                                           |
|--------------------------------------------------------------------|---------------------------------------------------------------------------|
| Reporting on sex and gender                                        | <input type="text" value="The study did not involve human participants"/> |
| Reporting on race, ethnicity, or other socially relevant groupings | <input type="text" value="The study did not involve human participants"/> |
| Population characteristics                                         | <input type="text" value="The study did not involve human participants"/> |
| Recruitment                                                        | <input type="text" value="The study did not involve human participants"/> |
| Ethics oversight                                                   | <input type="text" value="The study did not involve human participants"/> |

Note that full information on the approval of the study protocol must also be provided in the manuscript.

## Field-specific reporting

Please select the one below that is the best fit for your research. If you are not sure, read the appropriate sections before making your selection.

- Life sciences       Behavioural & social sciences       Ecological, evolutionary & environmental sciences

For a reference copy of the document with all sections, see [nature.com/documents/nr-reporting-summary-flat.pdf](https://www.nature.com/documents/nr-reporting-summary-flat.pdf)

## Life sciences study design

All studies must disclose on these points even when the disclosure is negative.

|                 |                                                                                                                                                                                                                                                                                                                                   |
|-----------------|-----------------------------------------------------------------------------------------------------------------------------------------------------------------------------------------------------------------------------------------------------------------------------------------------------------------------------------|
| Sample size     | <input type="text" value="Sample sizes were determined without statistical measures, but based on prior experience with the specific experiments and widely used sizes in relevant publications within this field of research in order to ensure that it will be appropriate for statistical analysis. See Methods for detail."/> |
| Data exclusions | <input type="text" value="No data were excluded from the analyses"/>                                                                                                                                                                                                                                                              |
| Replication     | <input type="text" value="All the sequencing experiments includes two or more independent biological replicates."/>                                                                                                                                                                                                               |
| Randomization   | <input type="text" value="No randomization was used in this study."/>                                                                                                                                                                                                                                                             |
| Blinding        | <input type="text" value="Experiments execution, data collection and result analysis were usually carried out by the same person, therefore no blinding was used."/>                                                                                                                                                              |

## Reporting for specific materials, systems and methods

We require information from authors about some types of materials, experimental systems and methods used in many studies. Here, indicate whether each material, system or method listed is relevant to your study. If you are not sure if a list item applies to your research, read the appropriate section before selecting a response.

## Materials &amp; experimental systems

|     |                                     |                                     |                               |
|-----|-------------------------------------|-------------------------------------|-------------------------------|
| n/a | <input type="checkbox"/>            | <input checked="" type="checkbox"/> | Involvement in the study      |
|     | <input type="checkbox"/>            | <input checked="" type="checkbox"/> | Antibodies                    |
|     | <input checked="" type="checkbox"/> | <input type="checkbox"/>            | Eukaryotic cell lines         |
|     | <input checked="" type="checkbox"/> | <input type="checkbox"/>            | Palaeontology and archaeology |
|     | <input type="checkbox"/>            | <input checked="" type="checkbox"/> | Animals and other organisms   |
|     | <input checked="" type="checkbox"/> | <input type="checkbox"/>            | Clinical data                 |
|     | <input checked="" type="checkbox"/> | <input type="checkbox"/>            | Dual use research of concern  |
|     | <input checked="" type="checkbox"/> | <input type="checkbox"/>            | Plants                        |

## Methods

|     |                                     |                                     |                          |
|-----|-------------------------------------|-------------------------------------|--------------------------|
| n/a | <input type="checkbox"/>            | <input checked="" type="checkbox"/> | Involvement in the study |
|     | <input type="checkbox"/>            | <input checked="" type="checkbox"/> | ChIP-seq                 |
|     | <input checked="" type="checkbox"/> | <input type="checkbox"/>            | Flow cytometry           |
|     | <input checked="" type="checkbox"/> | <input type="checkbox"/>            | MRI-based neuroimaging   |

## Antibodies

|                 |                                                                                                                                                                                                                                                                                                                                                                                                                                                                                                                                                                                                                                                                                                                                                                                                                                                                                                                                                                                                                                        |
|-----------------|----------------------------------------------------------------------------------------------------------------------------------------------------------------------------------------------------------------------------------------------------------------------------------------------------------------------------------------------------------------------------------------------------------------------------------------------------------------------------------------------------------------------------------------------------------------------------------------------------------------------------------------------------------------------------------------------------------------------------------------------------------------------------------------------------------------------------------------------------------------------------------------------------------------------------------------------------------------------------------------------------------------------------------------|
| Antibodies used | primary antibodies against H3K9me3 (Active Motif, 39161), Max (Proteintech, 10426-1-AP), Mcrs1 (Sigma, HPA039057), Oct4 (Santa Cruz, sc-5279) or Cdx2 (Abcam, ab76541)                                                                                                                                                                                                                                                                                                                                                                                                                                                                                                                                                                                                                                                                                                                                                                                                                                                                 |
| Validation      | <ol style="list-style-type: none"> <li>H3K9me3 (Active Motif, 39161)<br/><a href="https://www.thermofisher.cn/cn/zh/antibody/product/Histone-H3K9me3-Antibody-Polyclonal/39161">https://www.thermofisher.cn/cn/zh/antibody/product/Histone-H3K9me3-Antibody-Polyclonal/39161</a></li> <li>Max (Proteintech, 10426-1-AP)<br/><a href="https://www.ptglab.co.jp/Products/MAX-Antibody-10426-1-AP.htm">https://www.ptglab.co.jp/Products/MAX-Antibody-10426-1-AP.htm</a></li> <li>Mcrcs1 (Sigma, HPA039057)<br/><a href="https://www.sigmaaldrich.cn/CN/zh/product/sigma/hpa039057">https://www.sigmaaldrich.cn/CN/zh/product/sigma/hpa039057</a></li> <li>Oct4 (Santa Cruz, sc-5279)<br/><a href="https://www.scbt.com/p/oct-3-4-antibody-c-10/">https://www.scbt.com/p/oct-3-4-antibody-c-10/</a></li> <li>Cdx2 (Abcam, ab76541)<br/><a href="https://www.abcam.cn/products/primary-antibodies/cdx2-antibody-epr2764y-ab76541.html">https://www.abcam.cn/products/primary-antibodies/cdx2-antibody-epr2764y-ab76541.html</a></li> </ol> |

## Animals and other research organisms

Policy information about [studies involving animals](#); [ARRIVE guidelines](#) recommended for reporting animal research, and [Sex and Gender in Research](#)

|                         |                                                                                                                                                                                                                                                                                                                                          |
|-------------------------|------------------------------------------------------------------------------------------------------------------------------------------------------------------------------------------------------------------------------------------------------------------------------------------------------------------------------------------|
| Laboratory animals      | The specific pathogen-free grade mice (SPF) grade mice, including C57BL/6j, DBA/2 and B6D2F1 mice were housed in the animal facility at Tongji University, Shanghai, China. The B6D2F1 hybrid mice (8-10 weeks old) were obtained from mating female C57BL/6j mice with male DBA/2 mice. All the mice had free access to food and water. |
| Wild animals            | The study did not involve wild animals.                                                                                                                                                                                                                                                                                                  |
| Reporting on sex        | The study did not involve sex                                                                                                                                                                                                                                                                                                            |
| Field-collected samples | The study did not involve samples collected from the field.                                                                                                                                                                                                                                                                              |
| Ethics oversight        | All experiments were performed in accordance with the University of Health Guide for the Care and Use of Laboratory Animals and were approved by the Biological Research Ethics Committee of Tongji University.                                                                                                                          |

Note that full information on the approval of the study protocol must also be provided in the manuscript.

## Plants

|                       |                                  |
|-----------------------|----------------------------------|
| Seed stocks           | The study did not involve plants |
| Novel plant genotypes | The study did not involve plants |
| Authentication        | The study did not involve plants |

## ChIP-seq

## Data deposition

- Confirm that both raw and final processed data have been deposited in a public database such as [GEO](#).
- Confirm that you have deposited or provided access to graph files (e.g. BED files) for the called peaks.

Data access links

May remain private before publication.

<https://www.ncbi.nlm.nih.gov/geo/query/acc.cgi?acc=GSE195762>

Files in database submission

GSM5833522 6hpa\_siSuv39h2\_H3k9me3  
GSM5833523 6hpa\_control\_H3K9me3  
GSM5833802 cumulus cell-CC\_H3K9me3\_rep1  
GSM5833803 cumulus cell-CC\_H3K9me3\_rep2  
GSM5833804 cumulus cell-CC\_H3K9me3\_rep3  
GSM5833805 cumulus cell-CC\_H3K9me3\_rep4  
GSM5833806 NT-6h\_H3K9me3\_rep1  
GSM5833807 NT-6h\_H3K9me3\_rep2  
GSM5833808 NT-6h\_H3K9me3\_rep3  
GSM5833809 NT-6h\_H3K9me3\_rep4  
GSM5833810 NT-6h\_H3K9me3\_rep5  
GSM5833811 NT-14h\_H3K9me3\_rep1  
GSM5833812 NT-14h\_H3K9me3\_rep2  
GSM5833813 NT-14h\_H3K9me3\_rep3  
GSM5833814 NT-14h\_H3K9me3\_rep4  
GSM5833815 NT-2cell\_H3K9me3\_rep1  
GSM5833816 NT-2cell\_H3K9me3\_rep2  
GSM5833817 NT-2cell\_H3K9me3\_rep3  
GSM5833818 NT-2cell\_H3K9me3\_rep4  
GSM5833819 NT-2cell\_H3K9me3\_rep5  
GSM5833820 NT-2cell\_H3K9me3\_rep6  
GSM5833821 NT-4cell\_H3K9me3\_rep1  
GSM5833822 NT-4cell\_H3K9me3\_rep2  
GSM5833823 NT-4cell\_H3K9me3\_rep3  
GSM5833824 NT-8cell\_H3K9me3\_rep1  
GSM5833825 NT-8cell\_H3K9me3\_rep2  
GSM5833826 NT-8cell\_H3K9me3\_rep3  
GSM5833827 NT-8cell\_H3K9me3\_rep4  
GSM5833828 NT-8cell\_H3K9me3\_rep5  
GSM5833829 NT-8cell\_H3K9me3\_rep6  
GSM5833830 NT-8cell\_H3K9me3\_rep7  
GSM5833831 NT-Morula\_H3K9me3\_rep1  
GSM5833832 NT-Morula\_H3K9me3\_rep2  
GSM5833833 NT-Morula\_H3K9me3\_rep3  
GSM5833834 NT-Morula\_H3K9me3\_rep4  
GSM5833835 NT-Morula\_H3K9me3\_rep5  
GSM5833836 NT-Morula\_H3K9me3\_rep6  
GSM5833837 NT-ICM\_H3K9me3\_rep1  
GSM5833838 NT-ICM\_H3K9me3\_rep2  
GSM5833839 NT-TE\_H3K9me3\_rep1  
GSM5833840 NT-TE\_H3K9me3\_rep2  
GSM5833841 Fertilized-PN5\_H3K9me3\_rep1  
GSM5833842 Fertilized-PN5\_H3K9me3\_rep2  
GSM5833843 cumulus cell-CC\_input\_rep1  
GSM5833844 cumulus cell-CC\_input\_rep2  
GSM5833845 cumulus cell-CC\_input\_rep3  
GSM5833846 cumulus cell-CC\_input\_rep4  
GSM5833847 NT-6h\_input\_rep1  
GSM5833848 NT-6h\_input\_rep2  
GSM5833849 NT-6h\_input\_rep3  
GSM5833850 NT-6h\_input\_rep4  
GSM5833851 NT-6h\_input\_rep5  
GSM5833852 NT-14h\_input\_rep1  
GSM5833853 NT-14h\_input\_rep2  
GSM5833854 NT-14h\_input\_rep3  
GSM5833855 NT-14h\_input\_rep4  
GSM5833856 NT-2cell\_input\_rep1  
GSM5833857 NT-2cell\_input\_rep2  
GSM5833858 NT-4cell\_input\_rep1  
GSM5833859 NT-4cell\_input\_rep2  
GSM5833860 NT-4cell\_input\_rep3  
GSM5833861 NT-8cell\_input\_rep1  
GSM5833862 NT-8cell\_input\_rep2  
GSM5833863 NT-8cell\_input\_rep3  
GSM5833864 NT-8cell\_input\_rep4

GSM5833865 NT-Morula\_input\_rep1  
GSM5833866 NT-Morula\_input\_rep2  
GSM5833867 NT-Morula\_input\_rep3  
GSM5833868 NT-Morula\_input\_rep4  
GSM5833869 NT-Morula\_input\_rep5  
GSM5833870 NT-ICM\_input\_rep1  
GSM5833871 NT-ICM\_input\_rep2  
GSM5833872 NT-TE\_input\_rep1  
GSM5833873 NT-TE\_input\_rep2  
GSM5833874 Fertilized-PN5\_input\_rep1  
GSM5833875 Fertilized-PN5\_input\_rep2  
GSM5849700 cumulus cell-CC\_RNA\_rep1  
GSM5849701 cumulus cell-CC\_RNA\_rep2  
GSM5849702 cumulus cell-CC\_RNA\_rep3  
GSM5849703 NT-6h\_RNA\_rep1  
GSM5849704 NT-6h\_RNA\_rep2  
GSM5849705 NT-6h\_RNA\_rep3  
GSM5849706 NT-6h\_RNA\_rep4  
GSM5849707 NT-6h\_RNA\_rep5  
GSM5849708 NT-6h\_RNA\_rep6  
GSM5849709 NT-14h\_RNA\_rep1  
GSM5849710 NT-14h\_RNA\_rep2  
GSM5849711 NT-14h\_RNA\_rep3  
GSM5849712 NT-14h\_RNA\_rep4  
GSM5849713 NT-14h\_RNA\_rep5  
GSM5849714 NT-14h\_RNA\_rep6  
GSM5849715 NT-e2cell\_RNA\_rep1  
GSM5849716 NT-e2cell\_RNA\_rep2  
GSM5849717 NT-e2cell\_RNA\_rep3  
GSM5849718 NT-e2cell\_RNA\_rep4  
GSM5849719 NT-e2cell\_RNA\_rep5  
GSM5849720 NT-e2cell\_RNA\_rep6  
GSM5849721 NT-l2cell\_RNA\_rep1  
GSM5849722 NT-l2cell\_RNA\_rep2  
GSM5849723 NT-l2cell\_RNA\_rep3  
GSM5849724 NT-l2cell\_RNA\_rep4  
GSM5849725 NT-l2cell\_RNA\_rep5  
GSM5849726 NT-l2cell\_RNA\_rep6  
GSM5849727 NT-4cell\_RNA\_rep1  
GSM5849728 NT-4cell\_RNA\_rep2  
GSM5849729 NT-4cell\_RNA\_rep3  
GSM5849730 NT-4cell\_RNA\_rep4  
GSM5849731 NT-4cell\_RNA\_rep5  
GSM5849732 NT-8cell\_RNA\_rep1  
GSM5849733 NT-8cell\_RNA\_rep2  
GSM5849734 NT-8cell\_RNA\_rep3  
GSM5849735 NT-8cell\_RNA\_rep4  
GSM5849736 NT-8cell\_RNA\_rep5  
GSM5849737 NT-8cell\_RNA\_rep6  
GSM5849738 NT-Morula\_RNA\_rep1  
GSM5849739 NT-Morula\_RNA\_rep2  
GSM5849740 NT-Morula\_RNA\_rep3  
GSM5849741 NT-Morula\_RNA\_rep4  
GSM5849742 NT-Morula\_RNA\_rep5  
GSM5849743 NT-Morula\_RNA\_rep6  
GSM5849744 NT-ICM\_RNA\_rep1  
GSM5849745 NT-ICM\_RNA\_rep2  
GSM5849746 NT-ICM\_RNA\_rep3  
GSM5849747 NT-ICM\_RNA\_rep4  
GSM5849748 NT-ICM\_RNA\_rep5  
GSM5849749 NT-ICM\_RNA\_rep6  
GSM5849750 NT-TE\_RNA\_rep1  
GSM5849751 NT-TE\_RNA\_rep2  
GSM5849752 NT-TE\_RNA\_rep3  
GSM5849753 NT-TE\_RNA\_rep4  
GSM5849754 NT-TE\_RNA\_rep5  
GSM5849755 NT-TE\_RNA\_rep6  
GSM5849756 NF-ICM\_control\_RNA\_rep1

GSM5849757 NF-ICM\_control\_RNA\_rep2  
 GSM5849758 NF-ICM\_mphMax\_RNA\_rep1  
 GSM5849759 NF-ICM\_mphMax\_RNA\_rep2  
 GSM5849760 NF-ICM\_mphMcrcs1\_RNA\_rep1  
 GSM5849761 NF-ICM\_mphMcrcs1\_RNA\_rep2  
 GSM5849762 NF-TE\_control\_RNA\_rep1  
 GSM5849763 NF-TE\_control\_RNA\_rep2  
 GSM5849764 NF-TE\_mphMax\_RNA\_rep1  
 GSM5849765 NF-TE\_mphMax\_RNA\_rep2  
 GSM5849766 NF-TE\_mphMcrcs1\_RNA\_rep1  
 GSM5849767 NF-TE\_mphMcrcs1\_RNA\_rep2

Genome browser session  
 (e.g. [UCSC](#))

NA

## Methodology

Replicates

Two or more replicates were adopted.

Sequencing depth

About 80 million reads pairs for each replicate.

Antibodies

As described above.

Peak calling parameters

macs2 callpeak --broad -t \$ddir/\${k}\_K9me3.sorted.bam -c \$ddir/\${k}\_input.sorted.bam --outdir \$odir -f BAMPE -g mm -n \$k

Data quality

See Supplementary Figures.

Software

BWA mem; MACS2
